# Supplementary material for: High Dietary Intake of Iron Might Be Harmful to Atrial Fibrillation and Modified by Genetic Diversity: A Prospective Cohort Study
Source: MDPI journal article supplement (doi:10.3390/nu16050593), 2024-02-22
Supplement: s1 [file s1]

## Supplement Material

Table S1. Atrial fibrillation-associated 165 SNPs.

| Rs ID       | Position       | Risk/Reference | Effect | StdErr | <i>p</i> -Value        |
|-------------|----------------|----------------|--------|--------|------------------------|
|             |                | Allele         | (beta) |        |                        |
| rs284277    | chr1:10790797  | C/A            | 0.0422 | 0.0069 | $1.25 \times 10^{-9}$  |
| rs7529220   | chr1:22282619  | C/T            | 0.0621 | 0.0098 | $1.98 \times 10^{-10}$ |
| rs2885697   | chr1:41544279  | G/T            | 0.0439 | 0.007  | $2.88 \times 10^{-10}$ |
| rs11590635  | chr1:49309764  | A/G            | 0.1456 | 0.0248 | $4.12 \times 10^{-9}$  |
| rs146518726 | chr1:51535039  | A/G            | 0.1605 | 0.0207 | $8.27 \times 10^{-15}$ |
| rs1545300   | chr1:112464004 | C/T            | 0.0558 | 0.0073 | $1.48 \times 10^{-14}$ |
| rs4073778   | chr1:116297758 | A/C            | 0.0486 | 0.0067 | $4.96 \times 10^{-13}$ |
| rs10465885  | chr1:147232740 | C/T            | 0.0302 | 0.0067 | $5.74 \times 10^{-6}$  |
| rs79187193  | chr1:147255831 | G/A            | 0.1162 | 0.0153 | $3.15 \times 10^{-14}$ |
| rs6689306   | chr1:154395946 | A/G            | 0.046  | 0.0068 | $1.36 \times 10^{-11}$ |
| rs4999127   | chr1:154714006 | A/G            | 0.0827 | 0.0098 | $4.28 \times 10^{-17}$ |

|                   |                |     |        |        |                        |
|-------------------|----------------|-----|--------|--------|------------------------|
| <b>rs11264280</b> | chr1:154862952 | T/C | 0.1347 | 0.0071 | $3.07 \times 10^{-79}$ |
| <b>rs72700114</b> | chr1:170193825 | C/G | 0.2021 | 0.013  | $3.29 \times 10^{-54}$ |
| <b>rs72700118</b> | chr1:170194823 | A/C | 0.1227 | 0.0101 | $9.52 \times 10^{-34}$ |
| <b>rs577676</b>   | chr1:170587340 | C/T | 0.0923 | 0.0067 | $1.62 \times 10^{-43}$ |
| <b>rs10753933</b> | chr1:203026214 | T/G | 0.0609 | 0.0067 | $9.84 \times 10^{-20}$ |
| <b>rs4951258</b>  | chr1:205691316 | A/G | 0.0376 | 0.0067 | $2.10 \times 10^{-8}$  |
| <b>rs7578393</b>  | chr2:26165528  | T/C | 0.0614 | 0.0088 | $2.42 \times 10^{-12}$ |
| <b>rs11689011</b> | chr2:46541176  | T/C | 0.0321 | 0.0103 | $3.12 \times 10^{-8}$  |
| <b>rs11125871</b> | chr2:61470126  | C/T | 0.0394 | 0.0068 | $6.42 \times 10^{-9}$  |
| <b>rs2540949</b>  | chr2:65284231  | A/T | 0.0659 | 0.0068 | $2.95 \times 10^{-22}$ |
| <b>rs6747542</b>  | chr2:70106832  | T/C | 0.0554 | 0.0067 | $1.10 \times 10^{-16}$ |
| <b>rs72926475</b> | chr2:86594487  | G/A | 0.0683 | 0.0102 | $2.37 \times 10^{-11}$ |
| <b>rs28387148</b> | chr2:127433465 | T/C | 0.0741 | 0.0113 | $6.25 \times 10^{-11}$ |
| <b>rs67969609</b> | chr2:145760353 | G/C | 0.0711 | 0.0126 | $1.71 \times 10^{-8}$  |

|                   |                |     |        |        |                        |
|-------------------|----------------|-----|--------|--------|------------------------|
| <b>rs56181519</b> | chr2:175555714 | C/T | 0.0662 | 0.0077 | $6.46 \times 10^{-18}$ |
| <b>rs2288327</b>  | chr2:179411665 | G/A | 0.0919 | 0.0089 | $7.26 \times 10^{-25}$ |
| <b>rs3820888</b>  | chr2:201180023 | C/T | 0.0684 | 0.0068 | $5.75 \times 10^{-24}$ |
| <b>rs35544454</b> | chr2:213266003 | A/T | 0.0589 | 0.0087 | $1.10 \times 10^{-11}$ |
| <b>rs7650482</b>  | chr3:12841804  | G/A | 0.0711 | 0.007  | $1.79 \times 10^{-24}$ |
| <b>rs73041705</b> | chr3:24463235  | T/C | 0.0443 | 0.0073 | $1.55 \times 10^{-9}$  |
| <b>rs7374540</b>  | chr3:38634142  | A/C | 0.0325 | 0.0068 | $1.68 \times 10^{-6}$  |
| <b>rs7373065</b>  | chr3:38710315  | T/C | 0.2024 | 0.0251 | $7.58 \times 10^{-16}$ |
| <b>rs6790396</b>  | chr3:38771925  | G/C | 0.0627 | 0.0068 | $2.40 \times 10^{-20}$ |
| <b>rs34080181</b> | chr3:66454191  | G/A | 0.0446 | 0.0069 | $1.28 \times 10^{-10}$ |
| <b>rs17005647</b> | chr3:69406181  | T/C | 0.0413 | 0.0069 | $2.70 \times 10^{-9}$  |
| <b>rs6771054</b>  | chr3:89489529  | T/C | 0.0457 | 0.0068 | $2.42 \times 10^{-11}$ |
| <b>rs10804493</b> | chr3:111554426 | A/G | 0.0558 | 0.007  | $1.63 \times 10^{-15}$ |
| <b>rs1278493</b>  | chr3:135814009 | G/A | 0.0389 | 0.0068 | $8.77 \times 10^{-9}$  |

|                   |                |     |        |        |                         |
|-------------------|----------------|-----|--------|--------|-------------------------|
| <b>rs13077048</b> | chr3:141106954 | T/A | 0.0493 | 0.0104 | $4.75 \times 10^{-10}$  |
| <b>rs62274627</b> | chr3:148702947 | A/G | 0.0297 | 0.0109 | $2.46 \times 10^{-8}$   |
| <b>rs7612445</b>  | chr3:179172979 | T/G | 0.0493 | 0.0084 | $4.81 \times 10^{-9}$   |
| <b>rs60902112</b> | chr3:194800853 | T/C | 0.0445 | 0.0079 | $1.72 \times 10^{-8}$   |
| <b>rs34104130</b> | chr4:10101300  | G/T | 0.0365 | 0.0112 | $2.55 \times 10^{-11}$  |
| <b>rs1458038</b>  | chr4:81164723  | T/C | 0.0434 | 0.0072 | $1.74 \times 10^{-9}$   |
| <b>rs6841049</b>  | chr4:83910712  | T/G | 0.0242 | 0.0103 | $1.95 \times 10^{-8}$   |
| <b>rs10006327</b> | chr4:103890980 | C/T | 0.0364 | 0.0067 | $4.42 \times 10^{-8}$   |
| <b>rs244017</b>   | chr4:111255917 | T/G | 0.0194 | 0.0085 | 0.02247                 |
| <b>rs61501369</b> | chr4:111524629 | T/C | 0.1038 | 0.008  | $4.69 \times 10^{-38}$  |
| <b>rs6850025</b>  | chr4:111596360 | A/G | 0.1815 | 0.0154 | $4.93 \times 10^{-32}$  |
| <b>rs67249485</b> | chr4:111699685 | T/A | 0.3655 | 0.0081 | $7.32 \times 10^{-443}$ |
| <b>rs3853445</b>  | chr4:111761487 | T/C | 0.1693 | 0.0076 | $3.60 \times 10^{-109}$ |
| <b>rs79399769</b> | chr4:111925656 | C/T | 0.1197 | 0.0232 | $2.59 \times 10^{-7}$   |

|                    |                |     |        |        |                        |
|--------------------|----------------|-----|--------|--------|------------------------|
| <b>rs1532170</b>   | chr4:112165212 | G/A | 0.0306 | 0.007  | $1.26 \times 10^{-5}$  |
| <b>rs138311480</b> | chr4:112454295 | C/T | 0.0739 | 0.0284 | 0.00928                |
| <b>rs114904067</b> | chr4:112604821 | G/A | 0.082  | 0.0215 | 0.000136               |
| <b>rs7687819</b>   | chr4:113329345 | A/G | 0.0218 | 0.0079 | 0.00612                |
| <b>rs6829664</b>   | chr4:114448656 | G/A | 0.0556 | 0.0076 | $1.92 \times 10^{-13}$ |
| <b>rs10213171</b>  | chr4:148937537 | G/C | 0.091  | 0.0134 | $1.32 \times 10^{-11}$ |
| <b>rs10520260</b>  | chr4:174447349 | A/G | 0.0457 | 0.0073 | $3.36 \times 10^{-10}$ |
| <b>rs12648245</b>  | chr4:174641184 | T/C | 0.0926 | 0.0127 | $3.45 \times 10^{-13}$ |
| <b>rs6596717</b>   | chr5:106427609 | C/A | 0.0404 | 0.0068 | $3.00 \times 10^{-9}$  |
| <b>rs337705</b>    | chr5:113737062 | G/T | 0.0564 | 0.0068 | $1.63 \times 10^{-16}$ |
| <b>rs2012809</b>   | chr5:128190363 | G/A | 0.0582 | 0.0094 | $4.92 \times 10^{-10}$ |
| <b>rs2040862</b>   | chr5:137419989 | T/C | 0.1084 | 0.0087 | $1.08 \times 10^{-35}$ |
| <b>rs17118812</b>  | chr5:139703286 | C/T | 0.0431 | 0.0114 | $1.83 \times 10^{-10}$ |
| <b>rs6580277</b>   | chr5:142818123 | G/A | 0.067  | 0.0079 | $1.64 \times 10^{-17}$ |

|                    |                |     |        |        |                        |
|--------------------|----------------|-----|--------|--------|------------------------|
| <b>rs12188351</b>  | chr5:168386089 | A/G | 0.0865 | 0.0145 | $2.52 \times 10^{-9}$  |
| <b>rs6891790</b>   | chr5:172670745 | G/T | 0.0729 | 0.0076 | $4.53 \times 10^{-22}$ |
| <b>rs28439930</b>  | chr5:173393111 | G/C | 0.0458 | 0.0068 | $1.19 \times 10^{-11}$ |
| <b>rs73366713</b>  | chr6:16415751  | G/A | 0.1035 | 0.0099 | $1.53 \times 10^{-25}$ |
| <b>rs34969716</b>  | chr6:18210109  | A/G | 0.0702 | 0.0078 | $1.60 \times 10^{-19}$ |
| <b>rs2308655</b>   | chr6:31322303  | C/G | 0.0494 | 0.012  | $8.09 \times 10^{-9}$  |
| <b>rs3176326</b>   | chr6:36647289  | G/A | 0.0626 | 0.0085 | $1.42 \times 10^{-13}$ |
| <b>rs12211255</b>  | chr6:76188330  | A/C | 0.057  | 0.0159 | $2.60 \times 10^{-10}$ |
| <b>rs2031522</b>   | chr6:87821501  | A/G | 0.0436 | 0.0068 | $1.47 \times 10^{-10}$ |
| <b>rs3951016</b>   | chr6:118559658 | A/T | 0.0648 | 0.0067 | $2.15 \times 10^{-22}$ |
| <b>rs9401451</b>   | chr6:122099152 | G/A | 0.0733 | 0.011  | $2.51 \times 10^{-11}$ |
| <b>rs13195459</b>  | chr6:122403559 | G/A | 0.0623 | 0.007  | $4.15 \times 10^{-19}$ |
| <b>rs4896104</b>   | chr6:135119089 | C/T | 0.0421 | 0.0103 | $8.62 \times 10^{-10}$ |
| <b>rs117984853</b> | chr6:149399100 | T/G | 0.1228 | 0.012  | $1.34 \times 10^{-24}$ |

|                   |                |     |        |        |                        |
|-------------------|----------------|-----|--------|--------|------------------------|
| <b>rs12700233</b> | chr7:904757    | T/G | 0.0367 | 0.0104 | $5.20 \times 10^{-11}$ |
| <b>rs55734480</b> | chr7:14372009  | A/G | 0.0548 | 0.0078 | $2.20 \times 10^{-12}$ |
| <b>rs6462079</b>  | chr7:28415827  | A/G | 0.0466 | 0.0076 | $8.79 \times 10^{-10}$ |
| <b>rs35005436</b> | chr7:74134911  | C/T | 0.0612 | 0.0097 | $3.34 \times 10^{-10}$ |
| <b>rs56201652</b> | chr7:92278116  | G/A | 0.0531 | 0.0075 | $1.74 \times 10^{-12}$ |
| <b>rs2283038</b>  | chr7:106835410 | T/C | 0.0266 | 0.012  | $9.76 \times 10^{-10}$ |
| <b>rs11773845</b> | chr7:116191301 | A/C | 0.1054 | 0.0067 | $2.39 \times 10^{-55}$ |
| <b>rs55985730</b> | chr7:128417044 | G/T | 0.0867 | 0.0149 | $5.24 \times 10^{-9}$  |
| <b>rs7789146</b>  | chr7:150661409 | G/A | 0.0584 | 0.0087 | $2.12 \times 10^{-11}$ |
| <b>rs35620480</b> | chr8:11499908  | C/A | 0.054  | 0.0092 | $5.15 \times 10^{-9}$  |
| <b>rs7508</b>     | chr8:17913970  | A/G | 0.0711 | 0.0075 | $1.69 \times 10^{-21}$ |
| <b>rs7834729</b>  | chr8:21821778  | G/T | 0.0653 | 0.0104 | $3.55 \times 10^{-10}$ |
| <b>rs17430364</b> | chr8:118863445 | T/A | 0.0425 | 0.0133 | $4.43 \times 10^{-8}$  |
| <b>rs62521286</b> | chr8:124551975 | G/A | 0.1202 | 0.0135 | $4.50 \times 10^{-19}$ |



|                   |                 |     |        |        |                        |
|-------------------|-----------------|-----|--------|--------|------------------------|
| <b>rs4871397</b>  | chr8:124635197  | G/C | 0.0756 | 0.0138 | $4.65 \times 10^{-8}$  |
| <b>rs35006907</b> | chr8:125859817  | A/C | 0.0083 | 0.0107 | $2.66 \times 10^{-8}$  |
| <b>rs72721963</b> | chr8:135798224  | G/A | 0.039  | 0.0174 | $1.91 \times 10^{-9}$  |
| <b>rs6994744</b>  | chr8:141740868  | C/A | 0.0405 | 0.0066 | $1.10 \times 10^{-9}$  |
| <b>rs10821415</b> | chr9:97713459   | A/C | 0.0821 | 0.0067 | $2.92 \times 10^{-34}$ |
| <b>rs4743034</b>  | chr9:109632353  | A/G | 0.0246 | 0.0122 | $6.14 \times 10^{-9}$  |
| <b>rs10760361</b> | chr9:127178266  | G/T | 0.0259 | 0.0106 | $6.04 \times 10^{-10}$ |
| <b>rs2274115</b>  | chr9:139094773  | G/A | 0.0487 | 0.0076 | $1.69 \times 10^{-10}$ |
| <b>rs12245149</b> | chr10:65321147  | C/A | 0.047  | 0.0067 | $1.66 \times 10^{-12}$ |
| <b>rs7096385</b>  | chr10:69664881  | T/C | 0.0707 | 0.013  | $4.87 \times 10^{-8}$  |
| <b>rs60212594</b> | chr10:75414344  | G/C | 0.1176 | 0.0096 | $9.20 \times 10^{-35}$ |
| <b>rs10458660</b> | chr10:77936576  | G/A | 0.0537 | 0.0087 | $6.78 \times 10^{-10}$ |
| <b>rs55693294</b> | chr10:105277474 | T/C | 0.0546 | 0.0146 | 0.000182               |
| <b>rs11598047</b> | chr10:105342672 | G/A | 0.1537 | 0.009  | $8.95 \times 10^{-66}$ |

|                   |                 |     |        |        |                        |
|-------------------|-----------------|-----|--------|--------|------------------------|
| <b>rs35176054</b> | chr10:105480387 | A/T | 0.1391 | 0.01   | $3.21 \times 10^{-44}$ |
| <b>rs10749053</b> | chr10:112576695 | T/C | 0.0555 | 0.0097 | $1.05 \times 10^{-8}$  |
| <b>rs10741807</b> | chr11:20011445  | T/C | 0.0729 | 0.0079 | $1.59 \times 10^{-20}$ |
| <b>rs565449</b>   | chr11:95092398  | G/A | 0.0409 | 0.0109 | $2.24 \times 10^{-9}$  |
| <b>rs4935786</b>  | chr11:121661507 | T/A | 0.0463 | 0.0079 | $4.85 \times 10^{-9}$  |
| <b>rs76097649</b> | chr11:128764570 | A/G | 0.1151 | 0.0124 | $1.26 \times 10^{-20}$ |
| <b>rs2291437</b>  | chr12:24715048  | G/T | 0.0955 | 0.0104 | $5.05 \times 10^{-20}$ |
| <b>rs4963776</b>  | chr12:24779491  | G/T | 0.0913 | 0.0088 | $1.84 \times 10^{-25}$ |
| <b>rs17380837</b> | chr12:26345526  | C/T | 0.0501 | 0.0072 | $4.80 \times 10^{-12}$ |
| <b>rs12809354</b> | chr12:32978437  | C/T | 0.0718 | 0.0094 | $2.89 \times 10^{-14}$ |
| <b>rs11614818</b> | chr12:56055815  | C/T | 0.0329 | 0.007  | $2.44 \times 10^{-6}$  |
| <b>rs2860482</b>  | chr12:57105938  | A/C | 0.054  | 0.0076 | $1.21 \times 10^{-12}$ |
| <b>rs71454237</b> | chr12:70013415  | G/A | 0.062  | 0.0084 | $1.78 \times 10^{-13}$ |
| <b>rs775498</b>   | chr12:70071513  | G/A | 0.0423 | 0.0074 | $1.05 \times 10^{-8}$  |

|                    |                 |     |        |        |                        |
|--------------------|-----------------|-----|--------|--------|------------------------|
| <b>rs12426679</b>  | chr12:76237987  | C/T | 0.0391 | 0.0067 | $4.95 \times 10^{-9}$  |
| <b>rs883079</b>    | chr12:114793240 | T/C | 0.0981 | 0.0074 | $2.84 \times 10^{-40}$ |
| <b>rs116904997</b> | chr12:120668534 | G/A | 0.1116 | 0.0405 | $1.28 \times 10^{-8}$  |
| <b>rs10773657</b>  | chr12:123327900 | C/A | 0.0575 | 0.0103 | $2.54 \times 10^{-8}$  |
| <b>rs7134121</b>   | chr12:124447346 | T/C | 0.0317 | 0.0108 | $2.00 \times 10^{-11}$ |
| <b>rs6560886</b>   | chr12:133150210 | C/T | 0.051  | 0.009  | $1.49 \times 10^{-8}$  |
| <b>rs9506925</b>   | chr13:23368943  | T/C | 0.0449 | 0.0075 | $2.72 \times 10^{-9}$  |
| <b>rs1980728</b>   | chr13:47247985  | G/T | 0.0361 | 0.0116 | $2.08 \times 10^{-9}$  |
| <b>rs35569628</b>  | chr13:113872712 | T/C | 0.0452 | 0.008  | $1.38 \times 10^{-8}$  |
| <b>rs422068</b>    | chr14:23864804  | C/T | 0.0439 | 0.007  | $3.87 \times 10^{-10}$ |
| <b>rs1957021</b>   | chr14:32924505  | C/T | 0.0583 | 0.008  | $2.27 \times 10^{-13}$ |
| <b>rs11156751</b>  | chr14:32990437  | C/T | 0.0719 | 0.0077 | $6.94 \times 10^{-21}$ |
| <b>rs73241997</b>  | chr14:35173775  | T/C | 0.0733 | 0.0093 | $2.94 \times 10^{-15}$ |
| <b>rs2738413</b>   | chr14:64679960  | A/G | 0.0778 | 0.0067 | $2.55 \times 10^{-31}$ |

|                    |                |     |        |        |                        |
|--------------------|----------------|-----|--------|--------|------------------------|
| <b>rs74884082</b>  | chr14:73249419 | C/T | 0.0493 | 0.0078 | $3.48 \times 10^{-10}$ |
| <b>rs10873298</b>  | chr14:77426525 | C/T | 0.0401 | 0.0069 | $7.07 \times 10^{-9}$  |
| <b>rs147301839</b> | chr15:57924714 | C/A | 0.3328 | 0.0523 | $1.93 \times 10^{-10}$ |
| <b>rs7170477</b>   | chr15:64103777 | A/G | 0.0393 | 0.0072 | $4.98 \times 10^{-8}$  |
| <b>rs745636</b>    | chr15:70457720 | G/A | 0.0392 | 0.0122 | $7.16 \times 10^{-10}$ |
| <b>rs74022964</b>  | chr15:73677264 | T/C | 0.1132 | 0.009  | $3.51 \times 10^{-36}$ |
| <b>rs12908004</b>  | chr15:80676925 | G/A | 0.0732 | 0.009  | $4.12 \times 10^{-16}$ |
| <b>rs2759301</b>   | chr15:80994288 | A/G | 0.039  | 0.0067 | $5.04 \times 10^{-9}$  |
| <b>rs4965430</b>   | chr15:99268850 | C/G | 0.0441 | 0.0069 | $1.26 \times 10^{-10}$ |
| <b>rs118159104</b> | chr16:1676804  | G/T | 0.1737 | 0.0325 | $9.28 \times 10^{-8}$  |
| <b>rs140185678</b> | chr16:2003016  | A/G | 0.1659 | 0.0218 | $2.43 \times 10^{-14}$ |
| <b>rs77316573</b>  | chr16:2265271  | T/C | 0.0529 | 0.0089 | $3.27 \times 10^{-9}$  |
| <b>rs2359171</b>   | chr16:73053022 | A/T | 0.1746 | 0.0086 | $4.65 \times 10^{-91}$ |
| <b>rs876727</b>    | chr16:73067761 | T/G | 0.084  | 0.0084 | $1.97 \times 10^{-23}$ |

|                   |                |     |        |        |                        |
|-------------------|----------------|-----|--------|--------|------------------------|
| <b>rs7225165</b>  | chr17:1309850  | G/A | 0.0655 | 0.0111 | $3.20 \times 10^{-9}$  |
| <b>rs9899183</b>  | chr17:7452977  | T/C | 0.0452 | 0.0075 | $2.02 \times 10^{-9}$  |
| <b>rs72811294</b> | chr17:12618680 | G/C | 0.072  | 0.0106 | $9.67 \times 10^{-12}$ |
| <b>rs11658278</b> | chr17:38031164 | T/C | 0.0443 | 0.0067 | $3.47 \times 10^{-11}$ |
| <b>rs1563304</b>  | chr17:44874453 | T/C | 0.0644 | 0.0092 | $2.56 \times 10^{-12}$ |
| <b>rs12604076</b> | chr17:76773638 | T/C | 0.0365 | 0.0066 | $3.63 \times 10^{-8}$  |
| <b>rs9953366</b>  | chr18:46474192 | C/T | 0.049  | 0.0073 | $1.82 \times 10^{-11}$ |
| <b>rs9963878</b>  | chr18:48679522 | C/T | 0.0653 | 0.012  | $4.85 \times 10^{-8}$  |
| <b>rs8088085</b>  | chr18:48708548 | A/C | 0.0365 | 0.0067 | $4.79 \times 10^{-8}$  |
| <b>rs2974231</b>  | chr19:48170757 | A/G | 0.033  | 0.0104 | $1.11 \times 10^{-9}$  |
| <b>rs2145274</b>  | chr20:6572014  | A/C | 0.0169 | 0.0231 | $7.47 \times 10^{-12}$ |
| <b>rs2834618</b>  | chr21:36119111 | T/G | 0.0944 | 0.0112 | $3.41 \times 10^{-17}$ |
| <b>rs56040242</b> | chr21:45766944 | A/G | 0.0417 | 0.0121 | $1.26 \times 10^{-8}$  |
| <b>rs464901</b>   | chr22:18597502 | T/C | 0.0508 | 0.0072 | $1.53 \times 10^{-12}$ |

|                 |                |     |        |        |                        |
|-----------------|----------------|-----|--------|--------|------------------------|
| <b>rs133902</b> | chr22:26164079 | T/C | 0.0419 | 0.0068 | $9.14 \times 10^{-10}$ |
|-----------------|----------------|-----|--------|--------|------------------------|

---

From: Nielsen JB, Thorolfsdottir RB, Fritsche LG, Zhou W, Skov MW, Graham SE, Herron TJ, McCarthy S, Schmidt EM, Sveinbjornsson G, et al. Biobank-driven genomic discovery yields new insight into atrial fibrillation biology. *Nat Genet.* 2018;50:1234–1239. doi: 10.1038/s41588-018-0171-3

Table S2. Iron-related 20 SNPs

| Chr | RsID      | Physical.<br>Pos   | Reference<br>Allele | Risk<br>Allele | Freq     | Info     |
|-----|-----------|--------------------|---------------------|----------------|----------|----------|
| 2   | rs744653  | $1.9 \times 10^8$  | C                   | T              | 0.858289 | 0.993131 |
| 3   | rs1799852 | $1.33 \times 10^8$ | C                   | T              | 0.096052 | 1        |
| 3   | rs8177240 | $1.33 \times 10^8$ | T                   | G              | 0.342583 | 0.997957 |
| 3   | rs3811647 | $1.33 \times 10^8$ | G                   | A              | 0.339334 | 1        |
| 4   | rs2245321 | $1.19 \times 10^8$ | C                   | T              | 0.733547 | 0.999007 |
| 6   | rs1799945 | 26091179           | C                   | G              | 0.145742 | 1        |
| 6   | rs1800562 | 26093141           | G                   | A              | 0.073364 | 0.997254 |
| 6   | rs3923809 | 38440970           | A                   | G              | 0.307114 | 1        |
| 8   | rs4921915 | 18272466           | G                   | A              | 0.774543 | 0.999584 |
| 9   | rs651007  | $1.36 \times 10^8$ | C                   | T              | 0.204646 | 1        |
| 11  | rs6486121 | 13355770           | C                   | T              | 0.626766 | 0.997253 |

|    |           |          |   |   |          |          |
|----|-----------|----------|---|---|----------|----------|
| 11 | rs174577  | 61604814 | C | A | 0.350486 | 0.998255 |
| 15 | rs1062980 | 78792527 | T | C | 0.386898 | 0.999555 |
| 17 | rs411988  | 56709034 | G | A | 0.546521 | 0.997588 |
| 20 | rs235756  | 6767111  | A | G | 0.3589   | 1        |
| 22 | rs855791  | 37462936 | A | G | 0.564611 | 0.987835 |
| 22 | rs5756506 | 37467392 | G | C | 0.376662 | 1        |
| 22 | rs4820268 | 37469591 | G | A | 0.538384 | 1        |
| 22 | rs2413450 | 37470224 | T | C | 0.541599 | 1        |
| 22 | rs2235324 | 37485724 | T | C | 0.388859 | 1        |

---



Table S3. Association results for the 185 single nucleotide polymorphisms analyzed and the distribution of Atrial fibrillation.

| SNP        | Risk-Free Genome     |                 |                   |        |                 | Risk Genome          |                 |                   |                 |
|------------|----------------------|-----------------|-------------------|--------|-----------------|----------------------|-----------------|-------------------|-----------------|
|            | Iron Intake Moderate |                 | Iron Intake High  |        | <i>p</i> -Value | Iron Intake Moderate |                 | Iron Intake High  |                 |
|            | HR (95CI%)           | <i>P</i> -Value | HR (95CI%)        |        |                 | HR (95CI%)           | <i>P</i> -Value | HR (95CI%)        | <i>P</i> -Value |
| rs10006327 | 1.12 (0.97, 1.28)    | 0.11            | 1.13 (0.96, 1.33) | 0.13   |                 | 1.03 (0.95, 1.1)     | 0.52            | 1.13 (1.03, 1.23) | 0.01            |
| rs10213171 | 1.05 (0.98, 1.13)    | 0.14            | 1.12 (1.03, 1.21) | 0.01   |                 | 0.98 (0.81, 1.19)    | 0.87            | 1.23 (0.99, 1.52) | 0.07            |
| rs10458660 | 1.07 (0.98, 1.16)    | 0.11            | 1.19 (1.08, 1.30) | <0.001 |                 | 1.01 (0.9, 1.13)     | 0.93            | 1.01 (0.88, 1.16) | 0.87            |
| rs10465885 | 1.04 (0.91, 1.20)    | 0.56            | 1.12 (0.95, 1.32) | 0.17   |                 | 1.05 (0.97, 1.13)    | 0.23            | 1.13 (1.04, 1.23) | 0.01            |
| rs10520260 | 1.06 (0.96, 1.16)    | 0.26            | 1.12 (1.00, 1.25) | 0.05   |                 | 1.04 (0.95, 1.13)    | 0.44            | 1.13 (1.02, 1.26) | 0.02            |
| rs10741807 | 1.22 (0.93, 1.61)    | 0.15            | 1.03 (0.73, 1.44) | 0.89   |                 | 1.04 (0.97, 1.11)    | 0.31            | 1.13 (1.05, 1.23) | <0.01           |
| rs10749053 | 1.10 (0.71, 1.70)    | 0.67            | 1.22 (0.74, 2.02) | 0.43   |                 | 1.05 (0.98, 1.12)    | 0.18            | 1.13 (1.04, 1.22) | <0.01           |
| rs10753933 | 1.05 (0.92, 1.21)    | 0.46            | 1.17 (0.99, 1.37) | 0.06   |                 | 1.04 (0.97, 1.12)    | 0.26            | 1.12 (1.03, 1.22) | 0.01            |

|                    |                   |      |                   |       |                   |      |                   |       |
|--------------------|-------------------|------|-------------------|-------|-------------------|------|-------------------|-------|
| <b>rs10760361</b>  | 1.03 (0.93, 1.15) | 0.54 | 1.11 (0.98, 1.25) | 0.10  | 1.05 (0.97, 1.15) | 0.22 | 1.14 (1.03, 1.26) | 0.01  |
| <b>rs10773657</b>  | 1.25 (0.72, 2.16) | 0.42 | 0.87 (0.44, 1.75) | 0.71  | 1.04 (0.98, 1.11) | 0.21 | 1.13 (1.05, 1.22) | <0.01 |
| <b>rs10804493</b>  | 0.92 (0.76, 1.11) | 0.39 | 0.97 (0.77, 1.22) | 0.80  | 1.06 (0.99, 1.14) | 0.08 | 1.15 (1.06, 1.25) | <0.01 |
| <b>rs10821415</b>  | 1.08 (0.96, 1.21) | 0.20 | 1.09 (0.95, 1.25) | 0.22  | 1.03 (0.95, 1.12) | 0.45 | 1.15 (1.05, 1.26) | <0.01 |
| <b>rs10873298</b>  | 0.97 (0.83, 1.14) | 0.74 | 1.01 (0.84, 1.23) | 0.88  | 1.06 (0.99, 1.14) | 0.10 | 1.15 (1.06, 1.25) | <0.01 |
| <b>rs11125871</b>  | 1.01 (0.91, 1.13) | 0.81 | 1.13 (1.00, 1.29) | 0.05  | 1.06 (0.98, 1.15) | 0.14 | 1.12 (1.02, 1.24) | 0.02  |
| <b>rs11156751</b>  | 1.07 (0.97, 1.17) | 0.16 | 1.13 (1.01, 1.26) | 0.03  | 1.02 (0.93, 1.12) | 0.65 | 1.13 (1.01, 1.26) | 0.03  |
| <b>rs11264280</b>  | 0.98 (0.89, 1.08) | 0.67 | 1.08 (0.96, 1.22) | 0.18  | 1.10 (1.01, 1.20) | 0.03 | 1.16 (1.05, 1.29) | <0.01 |
| <b>rs114904067</b> | 1.03 (0.97, 1.11) | 0.33 | 1.13 (1.04, 1.22) | <0.01 | 1.28 (0.96, 1.71) | 0.09 | 1.16 (0.82, 1.63) | 0.41  |
| <b>rs11590635</b>  | 1.05 (0.98, 1.12) | 0.17 | 1.13 (1.05, 1.22) | <0.01 | 1.01 (0.75, 1.36) | 0.93 | 1.11 (0.79, 1.58) | 0.54  |
| <b>rs11598047</b>  | 1.06 (0.98, 1.15) | 0.14 | 1.16 (1.05, 1.27) | <0.01 | 1.01 (0.9, 1.140) | 0.85 | 1.07 (0.93, 1.23) | 0.32  |
| <b>rs11614818</b>  | 0.93 (0.77, 1.11) | 0.41 | 0.99 (0.80, 1.24) | 0.95  | 1.06 (0.99, 1.14) | 0.08 | 1.15 (1.06, 1.25) | <0.01 |
| <b>rs11658278</b>  | 1.01 (0.89, 1.16) | 0.83 | 1.15 (0.98, 1.34) | 0.08  | 1.06 (0.98, 1.14) | 0.15 | 1.12 (1.03, 1.23) | 0.01  |
| <b>rs11689011</b>  | 1.08 (0.93, 1.26) | 0.31 | 1.15 (0.96, 1.38) | 0.13  | 1.04 (0.97, 1.12) | 0.31 | 1.12 (1.03, 1.22) | 0.01  |

|             |                   |      |                   |       |                   |       |                   |        |
|-------------|-------------------|------|-------------------|-------|-------------------|-------|-------------------|--------|
| rs116904997 | 1.06 (0.99, 1.13) | 0.11 | 1.13 (1.05, 1.23) | <0.01 | 0.86 (0.63, 1.17) | 0.33  | 0.99 (0.69, 1.42) | 0.96   |
| rs11773845  | 0.93 (0.79, 1.10) | 0.40 | 0.88 (0.72, 1.07) | 0.21  | 1.07 (0.99, 1.15) | 0.07  | 1.18 (1.08, 1.28) | <0.001 |
| rs117984853 | 1.04 (0.97, 1.12) | 0.26 | 1.15 (1.06, 1.25) | <0.01 | 1.06 (0.91, 1.23) | 0.48  | 1.03 (0.86, 1.24) | 0.72   |
| rs118159104 | 1.04 (0.97, 1.11) | 0.30 | 1.12 (1.04, 1.22) | <0.01 | 1.43 (0.96, 2.12) | 0.08  | 1.28 (0.79, 2.07) | 0.31   |
| rs12188351  | 1.02 (0.95, 1.09) | 0.66 | 1.09 (1.01, 1.19) | 0.03  | 1.36 (1.10, 1.68) | <0.01 | 1.47 (1.15, 1.87) | <0.01  |
| rs12211255  | 1.04 (0.97, 1.12) | 0.31 | 1.14 (1.05, 1.24) | <0.01 | 1.07 (0.93, 1.24) | 0.35  | 1.07 (0.90, 1.27) | 0.44   |
| rs12245149  | 1.13 (0.99, 1.28) | 0.07 | 1.23 (1.06, 1.42) | 0.01  | 1.02 (0.94, 1.10) | 0.67  | 1.09 (1.00, 1.19) | 0.06   |
| rs12426679  | 1.12 (0.99, 1.28) | 0.07 | 1.12 (0.96, 1.30) | 0.15  | 1.02 (0.94, 1.10) | 0.61  | 1.13 (1.04, 1.24) | 0.01   |
| rs12604076  | 1.09 (0.95, 1.26) | 0.21 | 1.21 (1.03, 1.43) | 0.02  | 1.03 (0.96, 1.11) | 0.39  | 1.11 (1.01, 1.21) | 0.02   |
| rs12648245  | 1.04 (0.97, 1.11) | 0.32 | 1.11 (1.02, 1.20) | 0.02  | 1.11 (0.92, 1.33) | 0.26  | 1.28 (1.04, 1.57) | 0.02   |
| rs12700233  | 1.09 (0.98, 1.23) | 0.12 | 1.24 (1.09, 1.42) | <0.01 | 1.02 (0.94, 1.11) | 0.57  | 1.07 (0.98, 1.18) | 0.15   |
| rs1278493   | 1.13 (0.97, 1.32) | 0.13 | 1.19 (1.00, 1.42) | 0.05  | 1.03 (0.96, 1.11) | 0.46  | 1.12 (1.02, 1.21) | 0.01   |
| rs12809354  | 1.05 (0.97, 1.13) | 0.25 | 1.12 (1.02, 1.23) | 0.01  | 1.04 (0.92, 1.18) | 0.53  | 1.15 (0.99, 1.32) | 0.07   |
| rs12908004  | 1.04 (0.96, 1.12) | 0.37 | 1.10 (1.01, 1.21) | 0.04  | 1.07 (0.95, 1.21) | 0.27  | 1.19 (1.04, 1.37) | 0.01   |

|                    |                   |      |                   |       |                   |      |                   |       |
|--------------------|-------------------|------|-------------------|-------|-------------------|------|-------------------|-------|
| <b>rs13077048</b>  | 1.04 (0.93, 1.16) | 0.49 | 1.08 (0.94, 1.23) | 0.28  | 1.05 (0.97, 1.14) | 0.25 | 1.15 (1.05, 1.27) | <0.01 |
| <b>rs13195459</b>  | 1.07 (0.97, 1.18) | 0.18 | 1.17 (1.04, 1.32) | 0.01  | 1.03 (0.94, 1.12) | 0.55 | 1.10 (0.99, 1.21) | 0.08  |
| <b>rs133902</b>    | 1.04 (0.93, 1.17) | 0.49 | 1.06 (0.92, 1.22) | 0.43  | 1.05 (0.97, 1.13) | 0.24 | 1.16 (1.06, 1.27) | <0.01 |
| <b>rs138311480</b> | 1.04 (0.97, 1.11) | 0.22 | 1.14 (1.05, 1.23) | <0.01 | 1.12 (0.81, 1.53) | 0.50 | 0.91 (0.62, 1.33) | 0.62  |
| <b>rs140185678</b> | 1.05 (0.98, 1.13) | 0.15 | 1.14 (1.05, 1.23) | <0.01 | 0.99 (0.79, 1.24) | 0.91 | 1.02 (0.79, 1.34) | 0.86  |
| <b>rs1458038</b>   | 1.04 (0.94, 1.14) | 0.47 | 1.13 (1.01, 1.26) | 0.03  | 1.06 (0.96, 1.16) | 0.25 | 1.13 (1.01, 1.26) | 0.03  |
| <b>rs146518726</b> | 1.05 (0.98, 1.12) | 0.16 | 1.13 (1.04, 1.22) | <0.01 | 0.98 (0.72, 1.34) | 0.92 | 1.16 (0.82, 1.66) | 0.40  |
| <b>rs147301839</b> | 1.05 (0.98, 1.12) | 0.16 | 1.13 (1.05, 1.22) | <0.01 | 0.76 (0.39, 1.47) | 0.41 | 0.93 (0.43, 2.00) | 0.85  |
| <b>rs1532170</b>   | 1.11 (0.99, 1.25) | 0.07 | 1.19 (1.04, 1.36) | 0.01  | 1.01 (0.94, 1.10) | 0.73 | 1.10 (1.00, 1.21) | 0.05  |
| <b>rs1545300</b>   | 1.05 (0.96, 1.16) | 0.28 | 1.16 (1.04, 1.29) | 0.01  | 1.04 (0.95, 1.14) | 0.44 | 1.10 (0.99, 1.23) | 0.08  |
| <b>rs1563304</b>   | 1.02 (0.94, 1.10) | 0.64 | 1.10 (1.00, 1.21) | 0.05  | 1.10 (0.98, 1.24) | 0.10 | 1.19 (1.04, 1.36) | 0.01  |
| <b>rs17005647</b>  | 1.04 (0.94, 1.15) | 0.44 | 1.11 (0.98, 1.25) | 0.10  | 1.05 (0.96, 1.14) | 0.28 | 1.14 (1.03, 1.26) | 0.01  |
| <b>rs17118812</b>  | 1.05 (0.95, 1.15) | 0.34 | 1.14 (1.02, 1.27) | 0.02  | 1.05 (0.95, 1.15) | 0.34 | 1.12 (1.00, 1.25) | 0.04  |
| <b>rs17380837</b>  | 0.99 (0.91, 1.09) | 0.90 | 1.07 (0.96, 1.19) | 0.19  | 1.10 (1.00, 1.21) | 0.04 | 1.19 (1.07, 1.33) | <0.01 |

|                   |                   |      |                   |        |                   |      |                   |       |
|-------------------|-------------------|------|-------------------|--------|-------------------|------|-------------------|-------|
| <b>rs17430364</b> | 1.06 (0.98, 1.15) | 0.16 | 1.15 (1.04, 1.26) | <0.01  | 1.02 (0.91, 1.14) | 0.74 | 1.09 (0.96, 1.24) | 0.19  |
| <b>rs1957021</b>  | 1.07 (0.98, 1.17) | 0.13 | 1.13 (1.02, 1.25) | 0.02   | 1.02 (0.92, 1.12) | 0.75 | 1.13 (1.01, 1.27) | 0.04  |
| <b>rs1980728</b>  | 0.88 (0.67, 1.14) | 0.32 | 1.01 (0.75, 1.37) | 0.94   | 1.06 (0.99, 1.13) | 0.10 | 1.14 (1.05, 1.23) | <0.01 |
| <b>rs2012809</b>  | 1.18 (0.77, 1.80) | 0.44 | 1.53 (0.95, 2.47) | 0.08   | 1.04 (0.98, 1.12) | 0.21 | 1.12 (1.03, 1.21) | 0.01  |
| <b>rs2031522</b>  | 1.00 (0.90, 1.11) | 0.96 | 1.07 (0.94, 1.20) | 0.31   | 1.08 (0.99, 1.18) | 0.08 | 1.17 (1.06, 1.29) | <0.01 |
| <b>rs2040862</b>  | 1.06 (0.98, 1.15) | 0.18 | 1.14 (1.03, 1.25) | 0.01   | 1.02 (0.92, 1.15) | 0.68 | 1.11 (0.98, 1.27) | 0.11  |
| <b>rs2145274</b>  | 1.04 (0.97, 1.11) | 0.30 | 1.13 (1.04, 1.22) | 0.01   | 1.09 (0.92, 1.30) | 0.32 | 1.14 (0.93, 1.40) | 0.21  |
| <b>rs2274115</b>  | 0.96 (0.77, 1.2)  | 0.73 | 1.03 (0.79, 1.34) | 0.84   | 1.05 (0.98, 1.13) | 0.13 | 1.14 (1.05, 1.23) | <0.01 |
| <b>rs2283038</b>  | 1.00 (0.92, 1.09) | 0.96 | 1.08 (0.98, 1.19) | 0.13   | 1.11 (1.00, 1.23) | 0.04 | 1.20 (1.07, 1.35) | <0.01 |
| <b>rs2288327</b>  | 1.04 (0.96, 1.12) | 0.38 | 1.09 (1.00, 1.20) | 0.06   | 1.07 (0.95, 1.20) | 0.28 | 1.21 (1.05, 1.38) | 0.01  |
| <b>rs2291437</b>  | 1.06 (0.99, 1.15) | 0.10 | 1.12 (1.03, 1.23) | 0.01   | 0.98 (0.85, 1.13) | 0.81 | 1.14 (0.97, 1.34) | 0.10  |
| <b>rs2308655</b>  | 1.08 (0.98, 1.2)  | 0.13 | 1.24 (1.10, 1.40) | <0.001 | 1.02 (0.94, 1.11) | 0.60 | 1.05 (0.95, 1.16) | 0.32  |
| <b>rs2359171</b>  | 1.08 (0.99, 1.17) | 0.07 | 1.17 (1.07, 1.29) | <0.01  | 0.99 (0.89, 1.11) | 0.88 | 1.05 (0.93, 1.20) | 0.42  |
| <b>rs244017</b>   | 1.01 (0.75, 1.37) | 0.94 | 1.12 (0.78, 1.59) | 0.54   | 1.05 (0.98, 1.12) | 0.17 | 1.13 (1.04, 1.22) | <0.01 |

|                   |                   |      |                   |       |                   |      |                   |       |
|-------------------|-------------------|------|-------------------|-------|-------------------|------|-------------------|-------|
| <b>rs2540949</b>  | 1.06 (0.95, 1.17) | 0.29 | 1.17 (1.04, 1.32) | 0.01  | 1.04 (0.95, 1.13) | 0.39 | 1.10 (0.99, 1.21) | 0.07  |
| <b>rs2738413</b>  | 1.06 (0.93, 1.21) | 0.39 | 1.12 (0.96, 1.3)  | 0.16  | 1.04 (0.97, 1.13) | 0.28 | 1.13 (1.04, 1.24) | 0.01  |
| <b>rs2759301</b>  | 1.02 (0.90, 1.14) | 0.78 | 1.11 (0.97, 1.27) | 0.14  | 1.06 (0.98, 1.15) | 0.16 | 1.14 (1.04, 1.25) | 0.01  |
| <b>rs2834618</b>  | 1.05 (0.98, 1.13) | 0.18 | 1.10 (1.02, 1.20) | 0.02  | 1.02 (0.87, 1.20) | 0.79 | 1.24 (1.04, 1.49) | 0.02  |
| <b>rs28387148</b> | 1.06 (0.98, 1.14) | 0.13 | 1.15 (1.05, 1.25) | <0.01 | 1.00 (0.87, 1.16) | 1.00 | 1.06 (0.89, 1.25) | 0.53  |
| <b>rs284277</b>   | 0.93 (0.79, 1.11) | 0.43 | 0.98 (0.80, 1.19) | 0.81  | 1.07 (0.99, 1.15) | 0.07 | 1.16 (1.06, 1.26) | <0.01 |
| <b>rs28439930</b> | 1.14 (1.00, 1.29) | 0.04 | 1.20 (1.04, 1.39) | 0.01  | 1.01 (0.94, 1.09) | 0.76 | 1.10 (1.01, 1.20) | 0.04  |
| <b>rs2860482</b>  | 1.12 (0.89, 1.42) | 0.34 | 1.02 (0.76, 1.35) | 0.91  | 1.04 (0.97, 1.11) | 0.27 | 1.14 (1.05, 1.23) | <0.01 |
| <b>rs2885697</b>  | 0.99 (0.81, 1.20) | 0.91 | 1.12 (0.88, 1.41) | 0.36  | 1.05 (0.98, 1.13) | 0.14 | 1.13 (1.04, 1.23) | <0.01 |
| <b>rs2974231</b>  | 1.03 (0.88, 1.20) | 0.69 | 1.02 (0.85, 1.22) | 0.85  | 1.05 (0.98, 1.13) | 0.20 | 1.15 (1.06, 1.26) | <0.01 |
| <b>rs3176326</b>  | 1.05 (0.97, 1.14) | 0.23 | 1.14 (1.03, 1.25) | 0.01  | 1.04 (0.93, 1.16) | 0.49 | 1.12 (0.98, 1.27) | 0.10  |
| <b>rs337705</b>   | 1.02 (0.92, 1.14) | 0.70 | 1.12 (0.99, 1.27) | 0.08  | 1.06 (0.98, 1.15) | 0.17 | 1.13 (1.03, 1.25) | 0.01  |
| <b>rs34080181</b> | 1.05 (0.95, 1.17) | 0.36 | 1.10 (0.97, 1.25) | 0.12  | 1.04 (0.96, 1.13) | 0.33 | 1.14 (1.04, 1.26) | 0.01  |
| <b>rs34104130</b> | 1.01 (0.92, 1.10) | 0.89 | 1.11 (1.00, 1.23) | 0.05  | 1.10 (0.99, 1.21) | 0.06 | 1.15 (1.03, 1.29) | 0.02  |

|                   |                   |      |                   |        |                   |      |                   |       |
|-------------------|-------------------|------|-------------------|--------|-------------------|------|-------------------|-------|
| <b>rs34969716</b> | 0.99 (0.90, 1.09) | 0.80 | 1.09 (0.97, 1.22) | 0.14   | 1.10 (1.00, 1.20) | 0.04 | 1.17 (1.05, 1.30) | <0.01 |
| <b>rs35005436</b> | 1.09 (1.01, 1.18) | 0.03 | 1.18 (1.07, 1.29) | <0.01  | 0.96 (0.85, 1.07) | 0.44 | 1.03 (0.90, 1.18) | 0.70  |
| <b>rs35006907</b> | 1.06 (0.96, 1.17) | 0.25 | 1.15 (1.03, 1.29) | 0.02   | 1.04 (0.95, 1.13) | 0.44 | 1.11 (1.00, 1.23) | 0.05  |
| <b>rs35176054</b> | 1.03 (0.95, 1.11) | 0.48 | 1.10 (1.00, 1.20) | 0.04   | 1.11 (0.97, 1.27) | 0.15 | 1.23 (1.05, 1.44) | 0.01  |
| <b>rs35544454</b> | 1.06 (0.98, 1.15) | 0.13 | 1.12 (1.02, 1.23) | 0.02   | 1.01 (0.9, 1.13)  | 0.86 | 1.14 (1.00, 1.30) | 0.06  |
| <b>rs35569628</b> | 1.07 (0.98, 1.16) | 0.12 | 1.16 (1.05, 1.28) | <0.01  | 1.01 (0.91, 1.12) | 0.81 | 1.08 (0.95, 1.22) | 0.23  |
| <b>rs35620480</b> | 1.05 (0.97, 1.14) | 0.21 | 1.12 (1.02, 1.22) | 0.02   | 1.04 (0.92, 1.17) | 0.57 | 1.16 (1.01, 1.34) | 0.03  |
| <b>rs3820888</b>  | 1.02 (0.92, 1.14) | 0.66 | 1.08 (0.95, 1.23) | 0.23   | 1.06 (0.98, 1.15) | 0.17 | 1.16 (1.05, 1.27) | <0.01 |
| <b>rs3853445</b>  | 1.08 (0.99, 1.18) | 0.09 | 1.11 (1.00, 1.23) | 0.05   | 1.00 (0.91, 1.11) | 0.93 | 1.15 (1.03, 1.30) | 0.02  |
| <b>rs3951016</b>  | 1.06 (0.93, 1.20) | 0.39 | 1.21 (1.05, 1.40) | 0.01   | 1.04 (0.97, 1.13) | 0.29 | 1.10 (1.00, 1.20) | 0.04  |
| <b>rs4073778</b>  | 1.14 (0.97, 1.33) | 0.10 | 1.12 (0.93, 1.35) | 0.22   | 1.03 (0.96, 1.1)  | 0.47 | 1.13 (1.04, 1.23) | 0.01  |
| <b>rs422068</b>   | 1.07 (0.96, 1.19) | 0.21 | 1.14 (1.01, 1.29) | 0.03   | 1.03 (0.95, 1.12) | 0.48 | 1.12 (1.01, 1.23) | 0.03  |
| <b>rs464901</b>   | 1.06 (0.96, 1.17) | 0.25 | 1.12 (1.00, 1.26) | 0.05   | 1.04 (0.95, 1.13) | 0.43 | 1.13 (1.02, 1.26) | 0.02  |
| <b>rs4743034</b>  | 1.07 (0.98, 1.17) | 0.12 | 1.21 (1.10, 1.34) | <0.001 | 1.01 (0.91, 1.12) | 0.81 | 1.01 (0.90, 1.14) | 0.83  |

|                   |                   |      |                   |       |                   |      |                   |       |
|-------------------|-------------------|------|-------------------|-------|-------------------|------|-------------------|-------|
| <b>rs4871397</b>  | 0.63 (0.25, 1.58) | 0.32 | 1.09 (0.37, 3.23) | 0.87  | 1.05 (0.98, 1.12) | 0.14 | 1.13 (1.05, 1.22) | <0.01 |
| <b>rs4896104</b>  | 1.17 (1.01, 1.37) | 0.04 | 1.31 (1.10, 1.56) | <0.01 | 1.02 (0.95, 1.09) | 0.64 | 1.09 (1.00, 1.19) | 0.05  |
| <b>rs4935786</b>  | 0.98 (0.79, 1.23) | 0.88 | 0.98 (0.75, 1.27) | 0.85  | 1.05 (0.98, 1.13) | 0.15 | 1.14 (1.06, 1.24) | <0.01 |
| <b>rs4951258</b>  | 1.10 (0.98, 1.22) | 0.10 | 1.11 (0.98, 1.27) | 0.10  | 1.02 (0.94, 1.11) | 0.65 | 1.14 (1.03, 1.25) | 0.01  |
| <b>rs4963776</b>  | 1.02 (0.94, 1.10) | 0.60 | 1.14 (1.04, 1.25) | <0.01 | 1.10 (0.98, 1.24) | 0.11 | 1.09 (0.95, 1.26) | 0.24  |
| <b>rs4965430</b>  | 1.17 (0.98, 1.38) | 0.08 | 1.17 (0.96, 1.42) | 0.13  | 1.03 (0.95, 1.10) | 0.49 | 1.12 (1.03, 1.22) | 0.01  |
| <b>rs4999127</b>  | 1.41 (0.81, 2.45) | 0.22 | 1.32 (0.70, 2.47) | 0.39  | 1.04 (0.98, 1.11) | 0.22 | 1.13 (1.04, 1.22) | <0.01 |
| <b>rs55693294</b> | 1.05 (0.98, 1.13) | 0.15 | 1.14 (1.05, 1.24) | <0.01 | 1.00 (0.83, 1.20) | 0.98 | 1.06 (0.85, 1.32) | 0.60  |
| <b>rs55734480</b> | 1.06 (0.97, 1.16) | 0.21 | 1.15 (1.03, 1.28) | 0.01  | 1.03 (0.94, 1.13) | 0.52 | 1.11 (0.99, 1.24) | 0.07  |
| <b>rs55985730</b> | 1.08 (1.00, 1.16) | 0.04 | 1.15 (1.06, 1.25) | <0.01 | 0.84 (0.70, 1.01) | 0.07 | 0.99 (0.80, 1.22) | 0.91  |
| <b>rs56040242</b> | 1.08 (0.99, 1.18) | 0.08 | 1.07 (0.96, 1.18) | 0.22  | 1.00 (0.90, 1.11) | 1.00 | 1.23 (1.09, 1.38) | <0.01 |
| <b>rs56181519</b> | 1.06 (0.97, 1.15) | 0.22 | 1.11 (1.00, 1.23) | 0.05  | 1.03 (0.93, 1.14) | 0.54 | 1.16 (1.03, 1.30) | 0.02  |
| <b>rs56201652</b> | 1.08 (0.99, 1.18) | 0.08 | 1.09 (0.98, 1.21) | 0.10  | 1.00 (0.91, 1.11) | 0.96 | 1.17 (1.05, 1.31) | 0.01  |
| <b>rs565449</b>   | 1.18 (0.96, 1.44) | 0.11 | 1.03 (0.81, 1.32) | 0.80  | 1.03 (0.96, 1.1)  | 0.40 | 1.14 (1.05, 1.23) | <0.01 |



|                   |                   |      |                   |       |                   |      |                   |       |
|-------------------|-------------------|------|-------------------|-------|-------------------|------|-------------------|-------|
| <b>rs577676</b>   | 1.10 (0.98, 1.24) | 0.10 | 1.09 (0.95, 1.25) | 0.20  | 1.02 (0.94, 1.10) | 0.65 | 1.15 (1.04, 1.26) | <0.01 |
| <b>rs60212594</b> | 1.04 (0.96, 1.12) | 0.35 | 1.13 (1.03, 1.23) | 0.01  | 1.07 (0.94, 1.23) | 0.30 | 1.13 (0.97, 1.32) | 0.12  |
| <b>rs60902112</b> | 1.04 (0.95, 1.13) | 0.36 | 1.19 (1.08, 1.31) | <0.01 | 1.05 (0.95, 1.17) | 0.30 | 1.05 (0.93, 1.18) | 0.45  |
| <b>rs61501369</b> | 1.04 (0.95, 1.13) | 0.41 | 1.13 (1.02, 1.26) | 0.02  | 1.05 (0.96, 1.16) | 0.28 | 1.12 (1.00, 1.26) | 0.05  |
| <b>rs62274627</b> | 1.03 (0.93, 1.13) | 0.61 | 1.15 (1.03, 1.29) | 0.01  | 1.06 (0.97, 1.16) | 0.19 | 1.11 (1.00, 1.23) | 0.06  |
| <b>rs62521286</b> | 1.07 (0.99, 1.14) | 0.08 | 1.16 (1.06, 1.26) | <0.01 | 0.93 (0.78, 1.11) | 0.42 | 0.97 (0.79, 1.19) | 0.79  |
| <b>rs6462079</b>  | 1.22 (0.92, 1.60) | 0.16 | 1.17 (0.85, 1.61) | 0.35  | 1.04 (0.97, 1.11) | 0.30 | 1.13 (1.04, 1.22) | <0.01 |
| <b>rs6560886</b>  | 0.95 (0.68, 1.31) | 0.74 | 0.82 (0.55, 1.23) | 0.34  | 1.05 (0.98, 1.12) | 0.14 | 1.14 (1.06, 1.24) | <0.01 |
| <b>rs6580277</b>  | 1.08 (0.99, 1.18) | 0.08 | 1.19 (1.07, 1.31) | <0.01 | 1.00 (0.91, 1.11) | 0.98 | 1.06 (0.94, 1.19) | 0.35  |
| <b>rs6596717</b>  | 1.07 (0.90, 1.26) | 0.45 | 1.23 (1.02, 1.50) | 0.03  | 1.04 (0.97, 1.12) | 0.25 | 1.11 (1.02, 1.21) | 0.01  |
| <b>rs6689306</b>  | 1.08 (0.92, 1.26) | 0.34 | 1.06 (0.88, 1.27) | 0.55  | 1.04 (0.97, 1.12) | 0.30 | 1.14 (1.05, 1.24) | <0.01 |
| <b>rs67249485</b> | 1.00 (0.92, 1.09) | 0.98 | 1.12 (1.02, 1.24) | 0.02  | 1.11 (1.01, 1.23) | 0.04 | 1.13 (1.01, 1.28) | 0.04  |
| <b>rs6747542</b>  | 1.02 (0.91, 1.15) | 0.74 | 1.1 (0.95, 1.26)  | 0.19  | 1.06 (0.98, 1.15) | 0.15 | 1.14 (1.04, 1.25) | <0.01 |
| <b>rs6790396</b>  | 1.17 (0.99, 1.38) | 0.07 | 1.15 (0.94, 1.40) | 0.18  | 1.02 (0.95, 1.10) | 0.52 | 1.13 (1.04, 1.22) | 0.01  |

|                   |                   |      |                   |        |                   |      |                   |       |
|-------------------|-------------------|------|-------------------|--------|-------------------|------|-------------------|-------|
| <b>rs67969609</b> | 1.05 (0.97, 1.12) | 0.21 | 1.14 (1.05, 1.23) | <0.01  | 1.03 (0.87, 1.23) | 0.69 | 1.08 (0.88, 1.32) | 0.46  |
| <b>rs6829664</b>  | 1.03 (0.94, 1.13) | 0.49 | 1.14 (1.03, 1.26) | 0.01   | 1.07 (0.97, 1.17) | 0.20 | 1.12 (1.00, 1.25) | 0.06  |
| <b>rs6841049</b>  | 1.04 (0.9, 1.19)  | 0.62 | 1.04 (0.88, 1.22) | 0.67   | 1.05 (0.98, 1.13) | 0.19 | 1.15 (1.06, 1.26) | <0.01 |
| <b>rs6850025</b>  | 1.05 (0.98, 1.13) | 0.16 | 1.16 (1.07, 1.26) | <0.001 | 1.01 (0.83, 1.22) | 0.94 | 0.88 (0.70, 1.11) | 0.27  |
| <b>rs6891790</b>  | 1.06 (0.97, 1.16) | 0.20 | 1.11 (1.00, 1.23) | 0.06   | 1.03 (0.93, 1.13) | 0.58 | 1.15 (1.03, 1.28) | 0.02  |
| <b>rs6994744</b>  | 1.00 (0.87, 1.14) | 0.96 | 1.08 (0.92, 1.25) | 0.35   | 1.06 (0.99, 1.15) | 0.12 | 1.15 (1.05, 1.25) | <0.01 |
| <b>rs7096385</b>  | 1.35 (0.43, 4.21) | 0.60 | 1.05 (0.28, 3.93) | 0.94   | 1.04 (0.98, 1.12) | 0.19 | 1.13 (1.04, 1.22) | <0.01 |
| <b>rs7134121</b>  | 1.11 (1.01, 1.23) | 0.04 | 1.16 (1.04, 1.31) | 0.01   | 1.00 (0.91, 1.09) | 0.96 | 1.10 (0.99, 1.22) | 0.06  |
| <b>rs71454237</b> | 1.07 (0.99, 1.17) | 0.10 | 1.16 (1.06, 1.28) | <0.01  | 1.00 (0.90, 1.11) | 0.98 | 1.07 (0.94, 1.21) | 0.31  |
| <b>rs7170477</b>  | 1.04 (0.95, 1.14) | 0.43 | 1.10 (0.99, 1.23) | 0.08   | 1.05 (0.96, 1.16) | 0.26 | 1.15 (1.03, 1.28) | 0.01  |
| <b>rs7225165</b>  | 1.05 (0.97, 1.13) | 0.23 | 1.11 (1.02, 1.21) | 0.01   | 1.05 (0.90, 1.21) | 0.54 | 1.19 (1.01, 1.41) | 0.04  |
| <b>rs72700114</b> | 1.07 (0.99, 1.15) | 0.08 | 1.14 (1.05, 1.24) | <0.01  | 0.94 (0.80, 1.10) | 0.46 | 1.09 (0.91, 1.31) | 0.37  |
| <b>rs72700118</b> | 1.05 (0.97, 1.13) | 0.25 | 1.16 (1.06, 1.26) | <0.01  | 1.05 (0.92, 1.20) | 0.46 | 1.04 (0.89, 1.21) | 0.61  |
| <b>rs72721963</b> | 1.02 (0.95, 1.1)  | 0.54 | 1.11 (1.02, 1.20) | 0.02   | 1.16 (0.99, 1.35) | 0.07 | 1.23 (1.03, 1.47) | 0.02  |

|                   |                      |      |                   |       |                   |      |                   |       |
|-------------------|----------------------|------|-------------------|-------|-------------------|------|-------------------|-------|
| <b>rs72811294</b> | 1.05 (0.98, 1.13)    | 0.18 | 1.12 (1.03, 1.22) | 0.01  | 1.03 (0.89, 1.19) | 0.72 | 1.17 (0.98, 1.38) | 0.08  |
| <b>rs72926475</b> | 1.06 (0.98, 1.14)    | 0.15 | 1.14 (1.04, 1.24) | <0.01 | 1.01 (0.88, 1.16) | 0.86 | 1.09 (0.93, 1.28) | 0.26  |
| <b>rs73041705</b> | 0.99 (0.9, 1.09)     | 0.84 | 1.09 (0.98, 1.22) | 0.11  | 1.1 (1.01, 1.21)  | 0.04 | 1.17 (1.05, 1.30) | 0.01  |
| <b>rs73241997</b> | 1.02 (0.95, 1.1)     | 0.59 | 1.11 (1.01, 1.22) | 0.02  | 1.11 (0.98, 1.26) | 0.09 | 1.18 (1.02, 1.36) | 0.03  |
| <b>rs73366713</b> | 1.07 (0.99, 1.16)    | 0.08 | 1.17 (1.07, 1.28) | <0.01 | 0.98 (0.86, 1.11) | 0.71 | 1.02 (0.87, 1.19) | 0.81  |
| <b>rs7373065</b>  | 57445.16 (0,<br>Inf) | 1.00 | 0 (0, Inf)        | 1.00  | 1.05 (0.98, 1.12) | 0.18 | 1.13 (1.05, 1.22) | <0.01 |
| <b>rs7374540</b>  | 1.01 (0.86, 1.19)    | 0.90 | 1.14 (0.94, 1.38) | 0.20  | 1.05 (0.98, 1.13) | 0.16 | 1.13 (1.04, 1.23) | 0.01  |
| <b>rs74022964</b> | 1.03 (0.96, 1.12)    | 0.41 | 1.12 (1.02, 1.23) | 0.02  | 1.07 (0.95, 1.21) | 0.24 | 1.15 (1.00, 1.33) | 0.04  |
| <b>rs745636</b>   | 1.04 (0.95, 1.13)    | 0.42 | 1.09 (0.99, 1.20) | 0.10  | 1.06 (0.96, 1.18) | 0.26 | 1.19 (1.05, 1.34) | 0.01  |
| <b>rs74884082</b> | 1.03 (0.94, 1.12)    | 0.54 | 1.10 (0.99, 1.21) | 0.07  | 1.07 (0.97, 1.19) | 0.19 | 1.17 (1.04, 1.32) | 0.01  |
| <b>rs7508</b>     | 1.12 (0.88, 1.43)    | 0.34 | 1.11 (0.83, 1.48) | 0.47  | 1.04 (0.97, 1.11) | 0.26 | 1.13 (1.04, 1.22) | <0.01 |
| <b>rs7529220</b>  | 0.94 (0.56, 1.58)    | 0.82 | 1.25 (0.70, 2.23) | 0.46  | 1.05 (0.98, 1.12) | 0.17 | 1.13 (1.04, 1.22) | <0.01 |
| <b>rs7578393</b>  | 1.38 (0.92, 2.06)    | 0.12 | 1.68 (1.06, 2.67) | 0.03  | 1.04 (0.97, 1.11) | 0.28 | 1.11 (1.03, 1.20) | 0.01  |

|                   |                   |      |                   |        |                   |      |                   |       |
|-------------------|-------------------|------|-------------------|--------|-------------------|------|-------------------|-------|
| <b>rs76097649</b> | 1.06 (0.99, 1.14) | 0.10 | 1.17 (1.08, 1.28) | <0.001 | 0.98 (0.84, 1.14) | 0.75 | 0.94 (0.78, 1.12) | 0.48  |
| <b>rs7612445</b>  | 1.04 (0.96, 1.13) | 0.35 | 1.14 (1.04, 1.26) | 0.01   | 1.06 (0.95, 1.18) | 0.32 | 1.10 (0.97, 1.26) | 0.14  |
| <b>rs7650482</b>  | 0.97 (0.80, 1.16) | 0.71 | 0.97 (0.78, 1.21) | 0.79   | 1.06 (0.99, 1.14) | 0.11 | 1.15 (1.06, 1.25) | <0.01 |
| <b>rs7687819</b>  | 1.05 (0.96, 1.14) | 0.27 | 1.14 (1.03, 1.26) | 0.01   | 1.04 (0.94, 1.16) | 0.45 | 1.11 (0.98, 1.25) | 0.11  |
| <b>rs77316573</b> | 1.02 (0.94, 1.10) | 0.71 | 1.14 (1.03, 1.25) | 0.01   | 1.11 (0.99, 1.24) | 0.07 | 1.11 (0.98, 1.27) | 0.11  |
| <b>rs775498</b>   | 1.06 (0.96, 1.16) | 0.26 | 1.12 (1.00, 1.25) | 0.04   | 1.04 (0.94, 1.14) | 0.46 | 1.14 (1.02, 1.27) | 0.02  |
| <b>rs7789146</b>  | 1.02 (0.94, 1.10) | 0.69 | 1.11 (1.01, 1.22) | 0.03   | 1.12 (0.99, 1.26) | 0.07 | 1.17 (1.02, 1.34) | 0.03  |
| <b>rs7834729</b>  | 1.04 (0.97, 1.12) | 0.28 | 1.12 (1.03, 1.23) | 0.01   | 1.06 (0.92, 1.22) | 0.44 | 1.14 (0.96, 1.35) | 0.14  |
| <b>rs79187193</b> | 1.03 (0.96, 1.10) | 0.48 | 1.11 (1.03, 1.20) | 0.01   | 1.30 (1.03, 1.65) | 0.03 | 1.34 (1.02, 1.75) | 0.04  |
| <b>rs79399769</b> | 1.06 (0.99, 1.13) | 0.11 | 1.14 (1.05, 1.23) | <0.01  | 0.87 (0.66, 1.15) | 0.33 | 0.94 (0.68, 1.30) | 0.70  |
| <b>rs8088085</b>  | 1.13 (1.01, 1.28) | 0.04 | 1.18 (1.03, 1.36) | 0.02   | 1.01 (0.93, 1.09) | 0.81 | 1.11 (1.01, 1.21) | 0.03  |
| <b>rs876727</b>   | 1.04 (0.96, 1.13) | 0.33 | 1.13 (1.03, 1.24) | 0.01   | 1.05 (0.95, 1.18) | 0.34 | 1.13 (0.99, 1.28) | 0.07  |
| <b>rs883079</b>   | 1.07 (0.83, 1.37) | 0.61 | 1.11 (0.83, 1.50) | 0.47   | 1.04 (0.98, 1.12) | 0.21 | 1.13 (1.04, 1.22) | <0.01 |
| <b>rs9401451</b>  | 1.06 (0.99, 1.14) | 0.09 | 1.14 (1.05, 1.24) | <0.01  | 0.97 (0.83, 1.13) | 0.67 | 1.09 (0.91, 1.30) | 0.35  |

|                  |                   |      |                   |      |                   |      |                   |       |
|------------------|-------------------|------|-------------------|------|-------------------|------|-------------------|-------|
| <b>rs9506925</b> | 0.99 (0.90, 1.08) | 0.80 | 1.06 (0.95, 1.18) | 0.29 | 1.11 (1.01, 1.22) | 0.03 | 1.21 (1.08, 1.35) | <0.01 |
| <b>rs9899183</b> | 0.91 (0.71, 1.16) | 0.45 | 1.13 (0.85, 1.50) | 0.41 | 1.06 (0.99, 1.13) | 0.10 | 1.13 (1.04, 1.22) | <0.01 |
| <b>rs9953366</b> | 0.96 (0.78, 1.17) | 0.67 | 1.05 (0.83, 1.33) | 0.69 | 1.06 (0.99, 1.13) | 0.12 | 1.14 (1.05, 1.23) | <0.01 |
| <b>rs9963878</b> | 1.05 (0.98, 1.13) | 0.15 | 1.13 (1.04, 1.23) | 0.01 | 1.01 (0.86, 1.18) | 0.91 | 1.13 (0.94, 1.36) | 0.18  |
| <b>rs855791</b>  | 0.93 (0.80, 1.07) | 0.31 | 1.16 (0.98, 1.37) | 0.09 | 1.08 (1.00, 1.16) | 0.05 | 1.12 (1.03, 1.22) | 0.01  |
| <b>rs1062980</b> | 1.10 (0.98, 1.22) | 0.10 | 1.15 (1.01, 1.30) | 0.03 | 1.02 (0.94, 1.1)  | 0.70 | 1.12 (1.01, 1.23) | 0.03  |
| <b>rs8177240</b> | 1.08 (0.97, 1.19) | 0.15 | 1.17 (1.04, 1.32) | 0.01 | 1.02 (0.94, 1.12) | 0.59 | 1.10 (0.99, 1.21) | 0.08  |
| <b>rs744653</b>  | 1.34 (0.80, 2.26) | 0.27 | 1.49 (0.83, 2.66) | 0.18 | 1.04 (0.98, 1.11) | 0.23 | 1.12 (1.04, 1.21) | <0.01 |
| <b>rs6486121</b> | 1.02 (0.85, 1.21) | 0.86 | 1.05 (0.85, 1.29) | 0.65 | 1.05 (0.98, 1.13) | 0.17 | 1.14 (1.05, 1.24) | <0.01 |
| <b>rs651007</b>  | 1.02 (0.94, 1.11) | 0.58 | 1.09 (0.99, 1.20) | 0.08 | 1.08 (0.97, 1.21) | 0.14 | 1.19 (1.05, 1.35) | 0.01  |
| <b>rs1799852</b> | 1.03 (0.96, 1.10) | 0.45 | 1.11 (1.02, 1.21) | 0.02 | 1.14 (0.97, 1.33) | 0.11 | 1.22 (1.02, 1.47) | 0.03  |
| <b>rs1799945</b> | 1.03 (0.95, 1.11) | 0.47 | 1.08 (0.99, 1.18) | 0.09 | 1.1 (0.97, 1.25)  | 0.15 | 1.27 (1.10, 1.47) | <0.01 |
| <b>rs2235324</b> | 1.04 (0.93, 1.15) | 0.51 | 1.15 (1.01, 1.30) | 0.03 | 1.05 (0.97, 1.14) | 0.23 | 1.12 (1.01, 1.23) | 0.03  |
| <b>rs2245321</b> | 1.33 (1.02, 1.72) | 0.03 | 1.25 (0.92, 1.69) | 0.15 | 1.03 (0.96, 1.10) | 0.43 | 1.12 (1.03, 1.21) | 0.01  |

|                  |                   |      |                   |       |                   |      |                   |        |
|------------------|-------------------|------|-------------------|-------|-------------------|------|-------------------|--------|
| <b>rs235756</b>  | 1.07 (0.96, 1.18) | 0.21 | 1.13 (1.00, 1.28) | 0.04  | 1.03 (0.95, 1.12) | 0.47 | 1.13 (1.02, 1.24) | 0.02   |
| <b>rs3811647</b> | 1.08 (0.97, 1.19) | 0.15 | 1.16 (1.04, 1.31) | 0.01  | 1.02 (0.94, 1.12) | 0.60 | 1.10 (0.99, 1.22) | 0.07   |
| <b>rs3923809</b> | 1.12 (1.02, 1.23) | 0.02 | 1.19 (1.06, 1.33) | <0.01 | 0.98 (0.90, 1.08) | 0.71 | 1.08 (0.97, 1.19) | 0.18   |
| <b>rs411988</b>  | 1.03 (0.89, 1.19) | 0.72 | 0.97 (0.81, 1.15) | 0.73  | 1.05 (0.98, 1.13) | 0.18 | 1.17 (1.07, 1.27) | <0.001 |
| <b>rs4921915</b> | 1.20 (0.88, 1.63) | 0.25 | 1.24 (0.86, 1.77) | 0.25  | 1.04 (0.97, 1.11) | 0.26 | 1.12 (1.04, 1.22) | <0.01  |
| <b>rs4820268</b> | 0.92 (0.80, 1.05) | 0.21 | 1.08 (0.92, 1.27) | 0.35  | 1.09 (1.01, 1.17) | 0.03 | 1.15 (1.05, 1.25) | <0.01  |
| <b>rs2413450</b> | 0.92 (0.80, 1.06) | 0.24 | 1.09 (0.93, 1.28) | 0.31  | 1.08 (1.01, 1.17) | 0.03 | 1.14 (1.05, 1.25) | <0.01  |
| <b>rs174577</b>  | 1.01 (0.92, 1.12) | 0.81 | 1.17 (1.04, 1.31) | 0.01  | 1.07 (0.98, 1.17) | 0.12 | 1.10 (0.99, 1.22) | 0.07   |
| <b>rs1800562</b> | 1.05 (0.98, 1.13) | 0.19 | 1.13 (1.04, 1.22) | 0.01  | 1.03 (0.87, 1.22) | 0.74 | 1.14 (0.93, 1.39) | 0.20   |
| <b>rs5756506</b> | 0.99 (0.89, 1.09) | 0.80 | 1.11 (0.98, 1.25) | 0.09  | 1.09 (1.00, 1.19) | 0.05 | 1.14 (1.04, 1.26) | 0.01   |

HR, hazard ratio; CI, confidence interval.

Adjusted for age, sex, ethnicity, smoking, drinking, BMI, diabetes history, antilipemic, iron supplement, hypertension, myocardial infarction, heart failure, stroke.

Table S4. Total number of enrichment of the input genes in FUMA.

|          |                                | N       |        |                       |          |                |                                                  |
|----------|--------------------------------|---------|--------|-----------------------|----------|----------------|--------------------------------------------------|
| Category | Gene Set                       | N Genes | Overla | P                     | Adj P    | Genes          | Link                                             |
|          |                                |         | p      |                       |          |                |                                                  |
| GO_bp    | GOBP_TRANSMEMBRANE_RECEPTOR_PR |         |        |                       |          | TF: HFE: CAV2: | http://www.gsea-                                 |
|          |                                |         |        |                       |          | CAV1: PTK2:    | msigdb.org/gsea/msigdb/human/geneset/GOBP_TRANSM |
|          | OTEIN_SERINE_THREONINE_KINASE_ | 376     | 10     | $1.88 \times 10^{-8}$ | 0.000146 | SIRT1: SORL1:  | EMBRANE_RECEPTOR_PROTEIN_SERINE_THREONINE_KINASE |
|          | SIGNALING_PATHWAY              |         |        |                       |          | PXN: SMAD7:    | _SIGNALING_PATHWAY                               |
|          |                                |         |        |                       |          | TMPRSS6        |                                                  |
|          |                                |         |        |                       |          | TTN: THRB:     | http://www.gsea-                                 |
| GO_bp    | GOBP_HEART_PROCESS             | 247     | 8      | $1.26 \times 10^{-7}$ | 0.000974 | SCN5A: SCN10A: | msigdb.org/gsea/msigdb/human/geneset/GOBP_HEART_ |
|          |                                |         |        |                       |          | CAV1: TBX5:    | PROCESS                                          |
|          |                                |         |        |                       |          | SGCG: SMAD7    |                                                  |

|              |                                         |     |   |                       |          |                  |                                                                                                                                                                                           |
|--------------|-----------------------------------------|-----|---|-----------------------|----------|------------------|-------------------------------------------------------------------------------------------------------------------------------------------------------------------------------------------|
|              |                                         |     |   |                       |          | TTN: SCN5A:      |                                                                                                                                                                                           |
|              |                                         |     |   |                       |          | CAV2: CAV1:      | <a href="http://www.gsea-msigdb.org/gsea/msigdb/human/geneset/GOBP_MUSCLE_TISSUE_DEVELOPMENT">http://www.gsea-</a>                                                                        |
| <b>G0_bp</b> | GOBP_MUSCLE_TISSUE_DEVELOPMENT          | 410 | 9 | $5.20 \times 10^{-7}$ | 0.004031 | NEURL1: TBX5:    | <a href="http://www.gsea-msigdb.org/gsea/msigdb/human/geneset/GOBP_MUSCLE_TISSUE_DEVELOPMENT">msigdb.org/gsea/msigdb/human/geneset/GOBP_MUSCLE</a>                                        |
|              |                                         |     |   |                       |          | SGCG:            | <a href="http://www.gsea-msigdb.org/gsea/msigdb/human/geneset/GOBP_MUSCLE_TISSUE_DEVELOPMENT">_TISSUE_DEVELOPMENT</a>                                                                     |
|              |                                         |     |   |                       |          | SMAD7:MYO18B     |                                                                                                                                                                                           |
|              |                                         |     |   |                       |          |                  | <a href="http://www.gsea-msigdb.org/gsea/msigdb/human/geneset/GOBP_MUSCLE_TISSUE_DEVELOPMENT">http://www.gsea-</a>                                                                        |
| <b>G0_bp</b> | GOBP_MEMBRANE_DEPOLARIZATION            | 74  | 5 | $9.22 \times 10^{-7}$ | 0.007146 | SCN5A: SCN10A:   | <a href="http://www.gsea-msigdb.org/gsea/msigdb/human/geneset/GOBP_MEMBRANE_DEPOLARIZATION">msigdb.org/gsea/msigdb/human/geneset/GOBP_MEMBRA</a>                                          |
|              |                                         |     |   |                       |          | CAV1: TBX5:SMAD7 | <a href="http://www.gsea-msigdb.org/gsea/msigdb/human/geneset/GOBP_MEMBRANE_DEPOLARIZATION">NE_DEPOLARIZATION</a>                                                                         |
|              |                                         |     |   |                       |          |                  | <a href="http://www.gsea-msigdb.org/gsea/msigdb/human/geneset/GOBP_MEMBRANE_DEPOLARIZATION">http://www.gsea-</a>                                                                          |
|              | GOBP_REGULATION_OF_ATRIAL_CARD          |     |   |                       |          |                  |                                                                                                                                                                                           |
| <b>G0_bp</b> | IAC_MUSCLE_CELL_MEMBRANE_DEPOLARIZATION | 9   | 3 | $1.07 \times 10^{-6}$ | 0.008313 | SCN5A: SCN10A:   | <a href="http://www.gsea-msigdb.org/gsea/msigdb/human/geneset/GOBP_REGULATION_OF_ATRIAL_CARDIAC_MUSCLE_CELL_MEMBRANE_DEPOLARIZATION">msigdb.org/gsea/msigdb/human/geneset/GOBP_REGULA</a> |
|              |                                         |     |   |                       |          | TBX5             | <a href="http://www.gsea-msigdb.org/gsea/msigdb/human/geneset/GOBP_REGULATION_OF_ATRIAL_CARDIAC_MUSCLE_CELL_MEMBRANE_DEPOLARIZATION">TION_OF_ATRIAL_CARDIAC_MUSCLE_CELL_MEMBRANE_DEPO</a> |
|              |                                         |     |   |                       |          |                  | <a href="http://www.gsea-msigdb.org/gsea/msigdb/human/geneset/GOBP_REGULATION_OF_ATRIAL_CARDIAC_MUSCLE_CELL_MEMBRANE_DEPOLARIZATION">LARIZATION</a>                                       |



|             |                        |     |    |                        |          |                                                                                                                                                         |
|-------------|------------------------|-----|----|------------------------|----------|---------------------------------------------------------------------------------------------------------------------------------------------------------|
|             |                        |     |    |                        |          | TTN: SCN5A:                                                                                                                                             |
|             |                        |     |    |                        |          | PITX2: HAND2: <a href="http://www.gsea-msigdb.org/gsea/msigdb/human/geneset/GOBP_HEART_DEVELOPMENT">http://www.gsea-</a>                                |
| GO_bp       | GOBP_HEART_DEVELOPMENT | 584 | 10 | $1.10 \times 10^{-6}$  | 0.008522 | PTK2: RBM20: <a href="http://www.gsea-msigdb.org/gsea/msigdb/human/geneset/GOBP_HEART_DEVELOPMENT">msigdb.org/gsea/msigdb/human/geneset/GOBP_HEART_</a> |
|             |                        |     |    |                        |          | TBX5: SGCG: DEVELOPMENT                                                                                                                                 |
|             |                        |     |    |                        |          | SMAD7: MYO18B                                                                                                                                           |
|             |                        |     |    |                        |          | CASZ1: HSPG2:                                                                                                                                           |
|             |                        |     |    |                        |          | SCMH1: KCNN3:                                                                                                                                           |
|             |                        |     |    |                        |          | LINC01142:                                                                                                                                              |
|             |                        |     |    |                        |          | ANXA4: GMCL1:                                                                                                                                           |
| GWAScatalog | Atrial fibrillation    | 217 | 47 | $4.95 \times 10^{-88}$ | 2.19E-84 | GYPC: TEX41:                                                                                                                                            |
| g           |                        |     |    |                        |          | FKBP7: TTN-AS1:                                                                                                                                         |
|             |                        |     |    |                        |          | TTN: SPATS2L:                                                                                                                                           |
|             |                        |     |    |                        |          | CAND2: THRB:                                                                                                                                            |
|             |                        |     |    |                        |          | SCN5A: SCN10A:                                                                                                                                          |

FRMD4B: PPP2R3A:

PITX2: HAND2:

HAND2-AS1:

KDM1B: DEK:

MIR548N: CDK6:

CAV2: CAV1:

FBX032: PTK2:

LHX3: SIRT1:

MYPN: NEURL1:

RBM20: NAV2:

SORL1: SSPN:

NACA: TBX5:

HIP1R: FBRSL1:

SGCG: IRF2BPL:

SCN10A: PPP2R3A:

datapoints)

SCN10A: PPP2R3A:

|             |                               |     |    |                        |          |                  |
|-------------|-------------------------------|-----|----|------------------------|----------|------------------|
|             |                               |     |    |                        |          | PITX2: HAND2:    |
|             |                               |     |    |                        |          | CAV1: FBXO32:    |
|             |                               |     |    |                        |          | RBM20: NAV2:     |
|             |                               |     |    |                        |          | TBX5: LRCH1:     |
|             |                               |     |    |                        |          | SMAD7: MYO18B    |
|             |                               |     |    |                        |          | KCNN3: ANXA4:    |
| GWAScatalog | Prevalent atrial fibrillation | 10  | 6  | $2.95 \times 10^{-14}$ | 1.31E-10 | GMCL1: PITX2:    |
| g           |                               |     |    |                        |          | CAV1: NEURL1     |
|             |                               |     |    |                        |          | CAND2: SCN5A:    |
| GWAScatalog | P wave duration               | 16  | 6  | $1.11 \times 10^{-12}$ | 4.92E-09 | SCN10A: CAV2:    |
| g           |                               |     |    |                        |          | CAV1:TBX5        |
|             |                               |     |    |                        |          | CASZ1: TEX41:    |
| GWAScatalog | Red blood cell count          | 509 | 13 | $1.71 \times 10^{-10}$ | 7.58E-07 | THRB: TF: LIN54: |
| g           |                               |     |    |                        |          | HFE: HLA-B:      |

|            |                             |    |   |                       |          |                |
|------------|-----------------------------|----|---|-----------------------|----------|----------------|
|            |                             |    |   |                       |          | CDK6: LHX3:    |
|            |                             |    |   |                       |          | FBRSL1: WNT3:  |
|            |                             |    |   |                       |          | SMAD7: TMPRSS6 |
|            |                             |    |   |                       |          | TTN: SCN5A:    |
| GWAScatalo | Electrocardiographic traits | 54 | 6 | $3.35 \times 10^{-9}$ | 1.48E-05 | SCN10A: PITX2: |
| g          | (multivariate)              |    |   |                       |          | CAV1: TBX5     |
| GWAScatalo |                             |    |   |                       |          | SCN5A: SCN10A: |
|            | PR segment duration         | 10 | 4 | $6.07 \times 10^{-9}$ | 2.68E-05 | CAV1: LRCH1    |
| g          |                             |    |   |                       |          |                |
| GWAScatalo | Ischemic stroke             | 11 | 4 | $9.52 \times 10^{-9}$ | 4.21E-05 | PITX2: CAV2:   |
| g          | (cardioembolic)             |    |   |                       |          | CAV1: NEURL1   |
| GWAScatalo |                             |    |   |                       |          | SCN5A: SCN10A: |
|            | Brugada syndrome            | 16 | 4 | $5.20 \times 10^{-8}$ | 0.00023  | TBX5: MYO18B   |
| g          |                             |    |   |                       |          |                |
| GWAScatalo |                             |    |   |                       |          | SCN5A: SCN10A  |
|            | Electrocardiographic traits | 17 | 4 | $6.79 \times 10^{-8}$ | 0.0003   | CAV1: TBX5     |
| g          |                             |    |   |                       |          |                |

|            |                              |     |    |                       |          |                  |
|------------|------------------------------|-----|----|-----------------------|----------|------------------|
| GWAScatalo |                              |     |    |                       |          | KCNN3: PITX2:    |
|            | Incident atrial fibrillation | 5   | 3  | $1.29 \times 10^{-7}$ | 0.000569 |                  |
| g          |                              |     |    |                       |          | NEURL1           |
| GWAScatalo |                              |     |    |                       |          | SCN5A: SCN10A:   |
|            | QRS duration                 | 55  | 5  | $2.06 \times 10^{-7}$ | 0.000912 |                  |
| g          |                              |     |    |                       |          | CAV1: NACA: TBX5 |
| GWAScatalo | Early onset atrial           |     |    |                       |          | PITX2: HAND2:    |
|            |                              | 6   | 3  | $2.57 \times 10^{-7}$ | 0.001136 |                  |
| g          | fibrillation                 |     |    |                       |          | NEURL1           |
| GWAScatalo |                              |     |    |                       |          | TTN: SCN10A:     |
|            | Sick sinus syndrome          | 7   | 3  | $4.48 \times 10^{-7}$ | 0.001984 |                  |
| g          |                              |     |    |                       |          | PITX2            |
| GWAScatalo | Iron status biomarkers       |     |    |                       |          |                  |
|            |                              | 8   | 3  | $7.16 \times 10^{-7}$ | 0.003169 | TF: HFE: TMPRSS6 |
| g          | (transferrin levels)         |     |    |                       |          |                  |
|            |                              |     |    |                       |          | CASZ1: GYPC:     |
| GWAScatalo |                              |     |    |                       |          | SPATS2L:         |
|            | Systolic blood pressure      | 704 | 11 | $7.35 \times 10^{-7}$ | 0.003253 |                  |
| g          |                              |     |    |                       |          | PPP2R3A: LIN54:  |
|            |                              |     |    |                       |          | HFE: HLA-B:      |

|             |                                      |     |    |                       |                                                                                                                                                          |
|-------------|--------------------------------------|-----|----|-----------------------|----------------------------------------------------------------------------------------------------------------------------------------------------------|
|             |                                      |     |    |                       | CDK6: TBX5:                                                                                                                                              |
|             |                                      |     |    |                       | FBRSL1: LRCH1                                                                                                                                            |
| GWAScatalog |                                      |     |    |                       |                                                                                                                                                          |
|             | Hepcidin levels                      | 9   | 3  | $1.07 \times 10^{-6}$ | 0.004746 TF: HFE: TMPRSS6                                                                                                                                |
| g           |                                      |     |    |                       |                                                                                                                                                          |
|             |                                      |     |    |                       | TEX41: PPP2R3A:                                                                                                                                          |
| GWAScatalog |                                      |     |    |                       | PITX2: CAV2:                                                                                                                                             |
|             | Intraocular pressure                 | 347 | 8  | $1.64 \times 10^{-6}$ | 0.007259                                                                                                                                                 |
| g           |                                      |     |    |                       | CAV1: FBXO32:                                                                                                                                            |
|             |                                      |     |    |                       | NEURL1: WNT3                                                                                                                                             |
|             |                                      |     |    |                       | HSPG2: SCN5A:                                                                                                                                            |
|             | GOCC_PLASMA_MEMBRANE_PROTEIN_COMPLEX |     |    |                       | <a href="http://www.gsea-msigdb.org/gsea/msigdb/human/geneset/GOCC_PLASMA_MEMBRANE_PROTEIN_COMPLEX">http://www.gsea-</a>                                 |
| GO_cc       |                                      | 551 | 10 | $6.50 \times 10^{-7}$ | 0.000655                                                                                                                                                 |
|             | OMPLEX                               |     |    |                       | SCN10A: TF: HFE:                                                                                                                                         |
|             |                                      |     |    |                       | <a href="http://www.gsea-msigdb.org/gsea/msigdb/human/geneset/GOCC_PLASMA_MEMBRANE_PROTEIN_COMPLEX">msigdb.org/gsea/msigdb/human/geneset/GOCC_PLASMA</a> |
|             |                                      |     |    |                       | HLA-B: CAV2:                                                                                                                                             |
|             |                                      |     |    |                       | _MEMBRANE_PROTEIN_COMPLEX                                                                                                                                |
|             |                                      |     |    |                       | CAV1: SSPN: SGCG                                                                                                                                         |

|                   |                                      |     |   |                       |          |                                             |                                                                                                                                                                                                                                                                                                               |
|-------------------|--------------------------------------|-----|---|-----------------------|----------|---------------------------------------------|---------------------------------------------------------------------------------------------------------------------------------------------------------------------------------------------------------------------------------------------------------------------------------------------------------------|
| Wikipathways      | WP_HFE_EFFECT_ON_HEPCIDIN_PRODUCTION | 7   | 3 | $4.48 \times 10^{-7}$ | 0.000329 | HFE: SMAD7: TMPRSS6                         | <a href="http://www.gsea-msigdb.org/gsea/msigdb/human/geneset/WP_HFE_EFFECT_ON_HEPCIDIN_PRODUCTION">http://www.gsea-</a><br><a href="http://www.gsea-msigdb.org/gsea/msigdb/human/geneset/WP_HFE_EFFECT_ON_HEPCIDIN_PRODUCTION">msigdb.org/gsea/msigdb/human/geneset/WP_HFE_EFFECT_ON_HEPCIDIN_PRODUCTION</a> |
|                   |                                      |     |   |                       |          |                                             |                                                                                                                                                                                                                                                                                                               |
| Wikipathways      | WP_INTEGRINMEDIATED_CELL_ADHESION    | 98  | 5 | $3.72 \times 10^{-6}$ | 0.002727 | CAV2: CAV1: PTK2: MYPN: PXN                 | <a href="http://www.gsea-msigdb.org/gsea/msigdb/human/geneset/WP_INTEGRINMEDIATED_CELL_ADHESION">http://www.gsea-</a><br><a href="http://www.gsea-msigdb.org/gsea/msigdb/human/geneset/WP_INTEGRINMEDIATED_CELL_ADHESION">msigdb.org/gsea/msigdb/human/geneset/WP_INTEGRINMEDIATED_CELL_ADHESION</a>          |
|                   |                                      |     |   |                       |          |                                             |                                                                                                                                                                                                                                                                                                               |
| Curated_gene_sets | WP_HFE_EFFECT_ON_HEPCIDIN_PRODUCTION | 7   | 3 | $4.48 \times 10^{-7}$ | 0.002912 | HFE: SMAD7: TMPRSS6                         | <a href="http://www.gsea-msigdb.org/gsea/msigdb/human/geneset/WP_HFE_EFFECT_ON_HEPCIDIN_PRODUCTION">http://www.gsea-</a><br><a href="http://www.gsea-msigdb.org/gsea/msigdb/human/geneset/WP_HFE_EFFECT_ON_HEPCIDIN_PRODUCTION">msigdb.org/gsea/msigdb/human/geneset/WP_HFE_EFFECT_ON_HEPCIDIN_PRODUCTION</a> |
|                   |                                      |     |   |                       |          |                                             |                                                                                                                                                                                                                                                                                                               |
| microRNA_targets  | MIR4324                              | 263 | 7 | $3.01 \times 10^{-6}$ | 0.007828 | KCNN3: GMCL1: CAND2: THRB: PTK2: RBM20: PXN | <a href="http://www.gsea-msigdb.org/gsea/msigdb/human/geneset/MIR4324">http://www.gsea-</a><br><a href="http://www.gsea-msigdb.org/gsea/msigdb/human/geneset/MIR4324">msigdb.org/gsea/msigdb/human/geneset/MIR4324</a>                                                                                        |
|                   |                                      |     |   |                       |          |                                             |                                                                                                                                                                                                                                                                                                               |
| TF_targets        | AP4_01                               | 258 | 7 | $2.65 \times 10^{-6}$ | 0.00296  | PITX2: CDK6: PTK2: MYPN:                    | <a href="http://www.gsea-msigdb.org/gsea/msigdb/human/geneset/AP4_01">http://www.gsea-</a><br><a href="http://www.gsea-msigdb.org/gsea/msigdb/human/geneset/AP4_01">msigdb.org/gsea/msigdb/human/geneset/AP4_01</a>                                                                                           |
|                   |                                      |     |   |                       |          |                                             |                                                                                                                                                                                                                                                                                                               |



|                   |                                |      |    |                       |          |                 |                                                                                                                                                          |
|-------------------|--------------------------------|------|----|-----------------------|----------|-----------------|----------------------------------------------------------------------------------------------------------------------------------------------------------|
|                   |                                |      |    |                       |          | SGCG: SMAD7:    |                                                                                                                                                          |
|                   |                                |      |    |                       |          | GLTSCR1         |                                                                                                                                                          |
|                   |                                |      |    |                       |          | KCNN3: SCN5A:   |                                                                                                                                                          |
|                   |                                |      |    |                       |          | PPP2R3A: PTK2:  |                                                                                                                                                          |
|                   |                                |      |    |                       |          | LHX3: MYPN:     | <a href="http://www.gsea-msigdb.org/gsea/msigdb/human/geneset/CAGCTG_AP4_Q5">http://www.gsea-</a>                                                        |
| <b>TF_targets</b> | CAGCTG_AP4_Q5                  | 1479 | 14 | $7.25 \times 10^{-6}$ | 0.008084 | NEURL1: NACA:   | <a href="http://www.gsea-msigdb.org/gsea/msigdb/human/geneset/CAGCTG_AP4_Q5">msigdb.org/gsea/msigdb/human/geneset/CAGCTG_AP4_</a>                        |
|                   |                                |      |    |                       |          | HIP1R: SGCG:    | Q5                                                                                                                                                       |
|                   |                                |      |    |                       |          | LRCH1: IRF2BPL: |                                                                                                                                                          |
|                   |                                |      |    |                       |          | GLTSCR1:MYO18B  |                                                                                                                                                          |
|                   |                                |      |    |                       |          |                 | <a href="http://www.gsea-msigdb.org/gsea/msigdb/human/geneset/WP_HFE_EFFECT_ON_HEPCIDIN_PRODUCTION">http://www.gsea-</a>                                 |
| <b>Canonical_</b> | WP_HFE_EFFECT_ON_HEPCIDIN_PROD |      |    |                       |          | HFE: SMAD7:     |                                                                                                                                                          |
|                   |                                | 7    | 3  | $4.48 \times 10^{-7}$ | 0.001386 |                 | <a href="http://www.gsea-msigdb.org/gsea/msigdb/human/geneset/WP_HFE_EFFECT_ON_HEPCIDIN_PRODUCTION">msigdb.org/gsea/msigdb/human/geneset/WP_HFE_EFFE</a> |
| <b>Pathways</b>   | UCTION                         |      |    |                       |          | TMPRSS6         |                                                                                                                                                          |
|                   |                                |      |    |                       |          |                 | CT_ON_HEPCIDIN_PRODUCTION                                                                                                                                |

Figure S1. Subgroup analysis

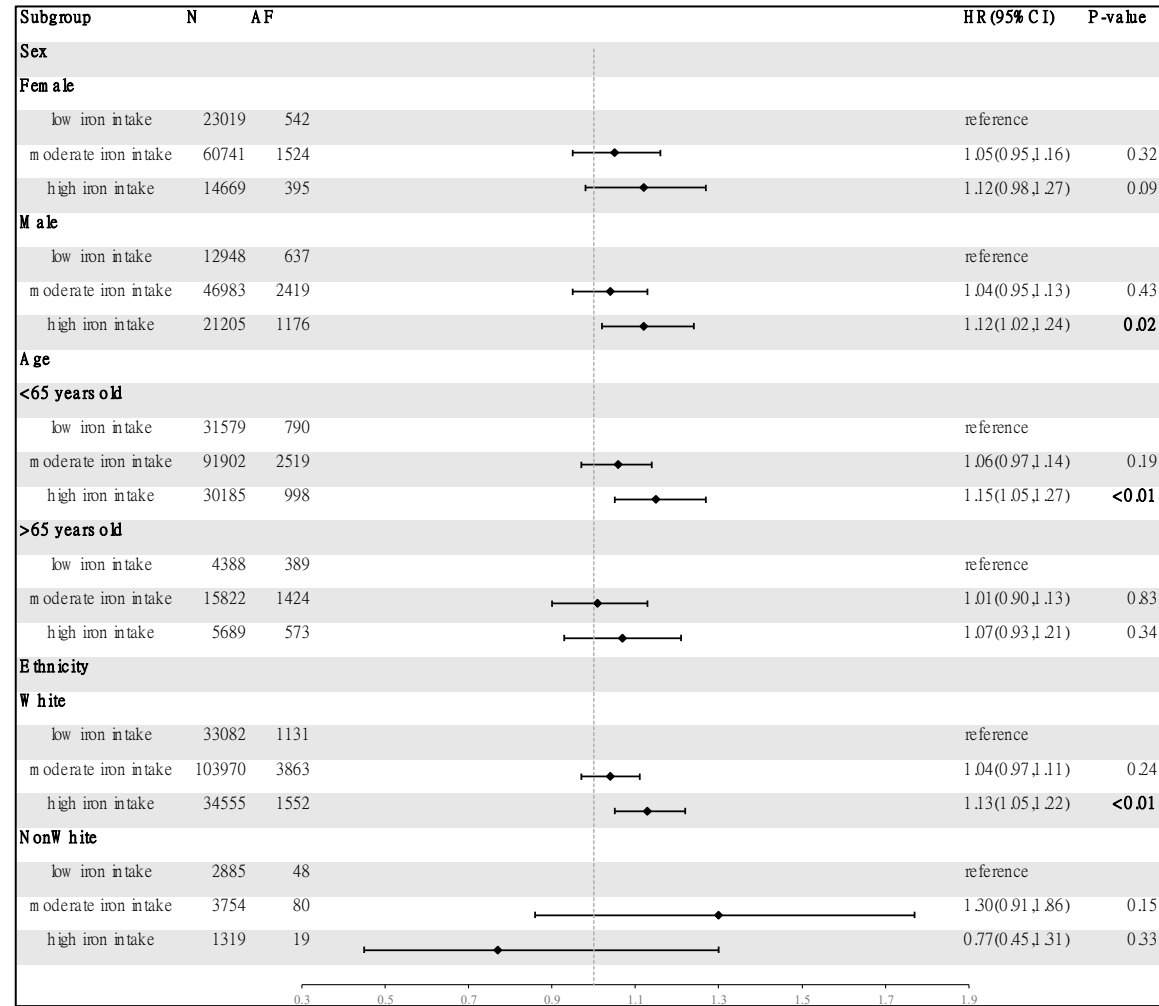

The magnitude of the association between dietary iron intake and the AF risk was greater in White ( $p$ -value <0.001),

in male participants (P-value=0.02), in younger than 65 years old participants (P-value <0.001).

Covariates included age, sex, ethnicity, smoking, drinking, BMI, diabetes history, antilipemic, iron supplement, hypertension, myocardial infarction, heart failure, stroke.
